# Supplementary material for: The Calcium Goes Meow: Effects of Ions and Glycosylation on Fel d 1, the Major Cat Allergen
Source: PubMed Central journal article supplement (PMC4489793; doi:10.1371/journal.pone.0132311), 2015-07-02
Supplement: pone.0132311.s002.pdf [file pone.0132311.s002.pdf]

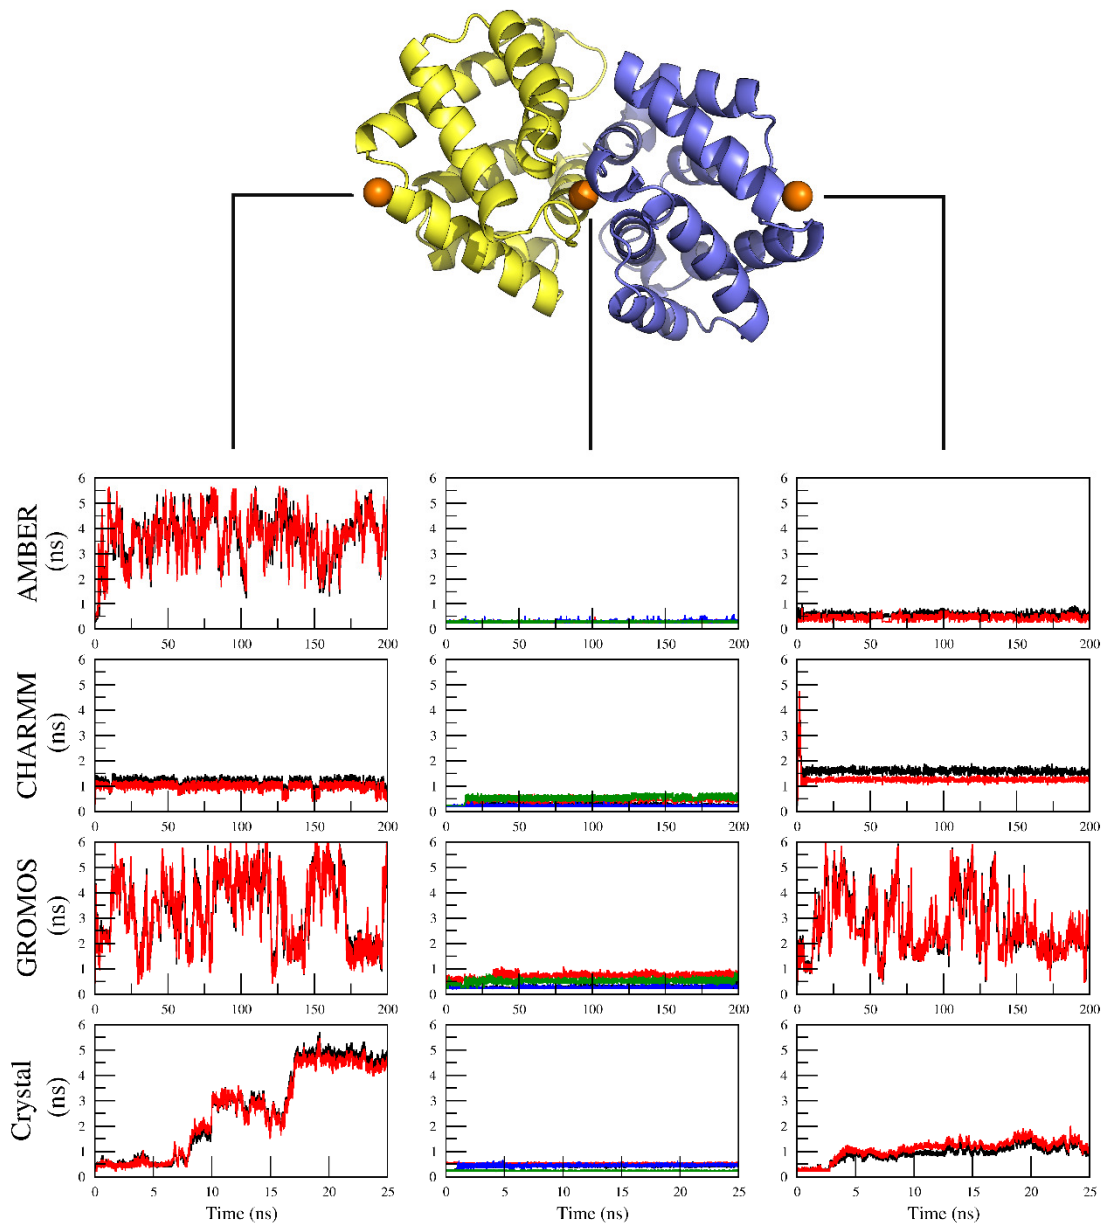

**Fig. S2.** Distances measured for molecular dynamics simulations of Fel d 1 under different force fields. Please refer to Table 1 for details.
