# Supplementary material for: The Calcium Goes Meow: Effects of Ions and Glycosylation on Fel d 1, the Major Cat Allergen
Source: PubMed Central journal article supplement (PMC4489793; doi:10.1371/journal.pone.0132311), 2015-07-02
Supplement: pone.0132311.s003.pdf [file pone.0132311.s003.pdf]

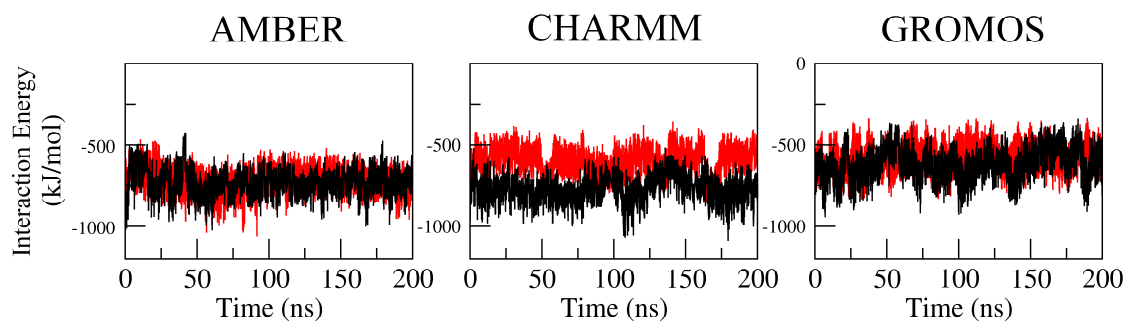

**Fig. S3. Interaction energies measured between Fel d 1 monomers during molecular dynamics simulations under different force fields.** Color coding: Simulations without Ca<sup>2+</sup> ions (black), simulations with Ca<sup>2+</sup> ions (red).
