# Supplementary material for: The Calcium Goes Meow: Effects of Ions and Glycosylation on Fel d 1, the Major Cat Allergen
Source: PubMed Central journal article supplement (PMC4489793; doi:10.1371/journal.pone.0132311), 2015-07-02
Supplement: pone.0132311.s004.pdf [file pone.0132311.s004.pdf]

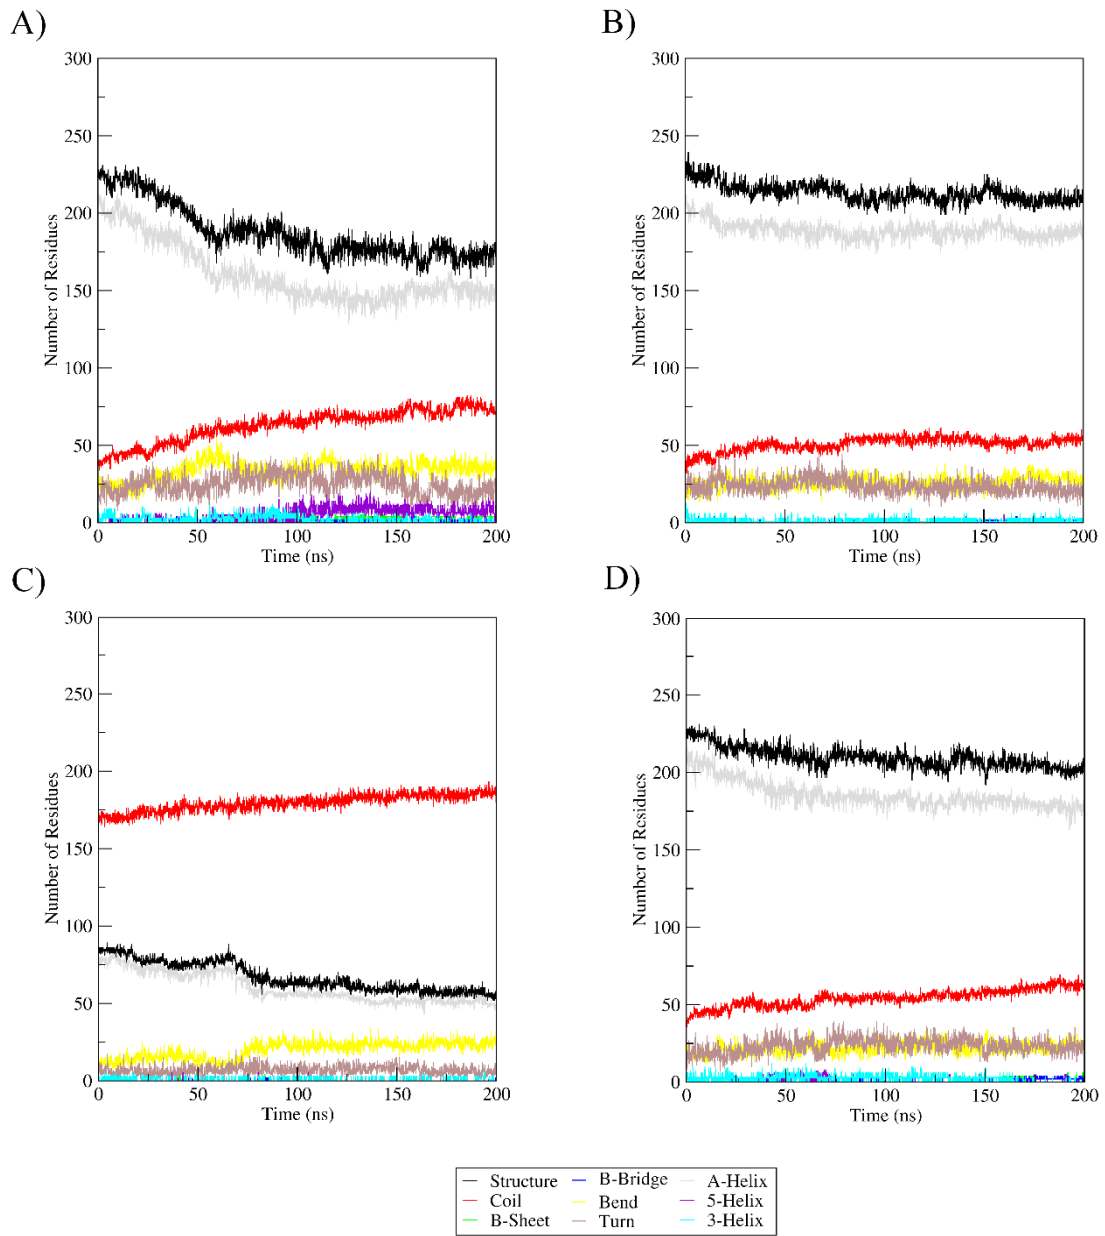

**Fig. S4. Secondary structure content for the Fel d 1 systems simulated with GROMOS. (A) Fel d 1 without  $\text{Ca}^{2+}$ ; (B) Fel d 1 with  $\text{Ca}^{2+}$ ; (C) Fel d 1 with minimal glycosylation; (D) Fel d 1 with full glycosylation.**
