# Supplementary material for: The Calcium Goes Meow: Effects of Ions and Glycosylation on Fel d 1, the Major Cat Allergen
Source: PubMed Central journal article supplement (PMC4489793; doi:10.1371/journal.pone.0132311), 2015-07-02
Supplement: pone.0132311.s008.pdf [file pone.0132311.s008.pdf]

**Table S1. Parameters used in the GROMOS 53A6glyc force field for sialic acid, in a GROMACS-compatible format.** These encompass atom types, atomic partial charges, charge-group definition, bond stretching, bond-angle bending, improper dihedral deformation and torsional potential dihedral.

```

[ NEUN ]
[ atoms ]
C5  CH1  0.00000  0
N5  N    -0.28000  0
HN5 H     0.28000  0
C5A C     0.38000  0
O5A O    -0.38000  0
C5B CH3  0.00000  0
C4  CH1  0.23200  1
O4  OA   -0.64200  1
HO4 H     0.41000  1
C7  CH1  0.23200  2
O7  OA   -0.64200  2
HO7 H     0.41000  2
C8  CH1  0.23200  3
O8  OA   -0.64200  3
HO8 H     0.41000  3
C9  CH2  0.23200  4
O9  OA   -0.64200  4
HO9 H     0.41000  4
C6  CH1  0.37600  5
O6  OA   -0.48000  5
C2  CH1  0.23200  5
O2  OA   -0.53800  5
HO2 H     0.41000  5
C3  CH2  0.00000  5
C1  C     0.36000  6
O1A OM   -0.68000  6
O1B OM   -0.68000  6

[ bonds ]
C5  N5  gb_21
N5  HN5 gb_2
N5  C5A gb_10
C5A O5A gb_5
C5A C5B gb_16
C5  C4  gb_26
C5  C6  gb_26
C4  O4  gb_20
C4  C3  gb_26
O4  HO4 gb_1
C3  C2  gb_26
C7  C6  gb_26
C7  O7  gb_20
O7  HO7 gb_1
C7  C8  gb_26
C8  O8  gb_20
O8  HO8 gb_1
C9  C8  gb_26
C9  O9  gb_20
O9  HO9 gb_1
C6  O6  gb_20
O6  C2  gb_20
C2  O2  gb_20
O2  HO2 gb_1
C1  O1A gb_6
C1  O1B gb_6
C1  C2  gb_26

[ angles ]
; ai aj ak gromos type
C6  C5  N5  ga_15
N5  C5  C4  ga_15
C5  N5  HN5 ga_18
C5  N5  C5A ga_31
HN5 N5  C5A ga_32
N5  C5A O5A ga_33
N5  C5A C5B ga_19
O5A C5A C5B ga_30
C4  C5  C6  ga_8
C5  C4  O4  ga_9
C5  C4  C3  ga_8
O4  C4  C3  ga_9
C4  O4  HO4 ga_12
C4  C3  C2  ga_8
C5  C6  C7  ga_8

C5  C6  O6  ga_9
C7  C6  O6  ga_9
HO7 O7  C7  ga_12
O7  C7  C6  ga_9
O7  C7  C8  ga_9
C6  C7  C8  ga_8
HO8 O8  C8  ga_12
O8  C8  C7  ga_9
O8  C8  C9  ga_9
C7  C8  C9  ga_8
O9  C9  C8  ga_9
HO9 O9  C9  ga_12
C6  O6  C2  ga_10
C3  C2  O6  ga_9
C3  C2  O2  ga_9
O6  C2  O2  ga_9
O6  C2  C1  ga_9
O2  C2  C1  ga_9
C2  O2  HO2 ga_12
O1A C1  O1B ga_38
O1A C1  C2  ga_22
O1B C1  C2  ga_22
C3  C2  C1  ga_8

[ impropers ]
; ai aj ak al gromos type
N5  C5A C5B HN5 gi_1
C5A C5B N5  O5A gi_1
C5  O6  C7  C6  gi_2
C5  O4  C3  C4  gi_2
C5  N5  C4  C6  gi_2
C2  O6  O2  C3  gi_2
C3  O6  C1  C2  gi_2
C1  O1A O1B C2  gi_1

[ dihedrals ]
; ai aj ak al gromos type
C3  C4  C5  N5  gd_16
C7  C6  C5  N5  gd_16
O4  C4  C5  N5  gd_17
O6  C6  C5  N5  gd_18
C4  C5  N5  C5A gd_39
C5  N5  C5A  C5B gd_14
C6  C5  C4  O4  gd_43
C6  C5  C4  O4  gd_44
C6  C5  C4  C3  gd_34
C4  C5  C6  C7  gd_34
C4  C5  C6  O6  gd_43
C4  C5  C6  O6  gd_44
C3  C4  O4  HO4 gd_30
C5  C4  C3  C2  gd_34
O4  C4  C3  C2  gd_43
O4  C4  C3  C2  gd_44
C4  C3  C2  O6  gd_43
C4  C3  C2  O6  gd_44
C4  C3  C2  O2  gd_43
C4  C3  C2  O2  gd_44
C6  C7  O7  HO7 gd_30
O7  C7  C6  O6  gd_5
O7  C7  C6  O6  gd_37
C6  C7  C8  O8  gd_43
C6  C7  C8  O8  gd_44
O7  C7  C8  O8  gd_18
C7  C8  O8  HO8 gd_30
C7  C8  C9  O9  gd_43
C7  C8  C9  O9  gd_44
O8  C8  C9  O9  gd_18
C8  C9  O9  HO9 gd_30
O1A C1  C2  C3  gd_40
C5  C6  O6  C2  gd_29
C6  O6  C2  C3  gd_29
O6  C2  O2  HO2 gd_2
O6  C2  O2  HO2 gd_32

[ exclusions ]
HO2  O6

```
