# Supplementary material for: The Calcium Goes Meow: Effects of Ions and Glycosylation on Fel d 1, the Major Cat Allergen
Source: PubMed Central journal article supplement (PMC4489793; doi:10.1371/journal.pone.0132311), 2015-07-02
Supplement: pone.0132311.s009.pdf [file pone.0132311.s009.pdf]

**Table S2. Essential node pairs detected in four Fel d 1 simulated systems.** Nodes that appear more than once are grouped by color. Interactions detected between pairs by PDBsum for the crystallographic structure are in parentheses.

|                          | <b>Interface<br/>(Chain A - Chain B)</b>                                                                | <b>Chain A</b>                                      | <b>Chain B</b>                                             |
|--------------------------|---------------------------------------------------------------------------------------------------------|-----------------------------------------------------|------------------------------------------------------------|
| Without Ca <sup>2+</sup> | Lys29-Asp82<br>(1HB, NBC)<br><b>Leu132</b> - <b>Leu94</b>                                               | Cys44-Cys118<br>(DS)<br>Ile64-Val102                | Leu41-Tyr119<br>(NBC)<br><b>Phe85</b> -Met134<br>(NBC)     |
|                          | Leu31- <b>Leu94</b><br>Asn91- <b>Leu129</b><br>(NBC)<br><b>Leu132</b> - <b>Phe85</b><br>(NBC)           | <b>Cys3</b> -Ala74<br>Val10-Phe84                   | <b>Val6</b> -Tyr81<br><b>Asn37</b> - <b>Arg127</b>         |
| Minimal Glycosylation    | <b>Phe85</b> -Asp130<br>(NBC)<br>Val128- <b>Leu94</b>                                                   | <b>Val6</b> - <b>Phe80</b><br>Ile40-Asn122<br>(NBC) | <b>Val6</b> - <b>Phe80</b><br><b>Asn37</b> - <b>Arg127</b> |
|                          | Ser139-Thr76<br>(NBC)                                                                                   |                                                     |                                                            |
|                          | <b>Phe85</b> - <b>Leu132</b><br>(NBC)<br>Asn89- <b>Leu129</b><br>(NBC)<br>Thr135- <b>Phe85</b><br>(NBC) | Lys7-Phe80<br><b>Asn37</b> - <b>Arg127</b><br>(2HB) | <b>Cys3</b> -Tyr65<br><b>Asn37</b> -Val128                 |

HB: hydrogen bond(s), NBC: non-bonded contacts, DS: disulfide bridge.

Note: There is a pair in the simulation with Ca<sup>2+</sup> (Leu129B-Arg127B) that connects the interface pair (Asn91-Leu129) to the 'hinge' pair (Arg127-Asn37).
