# Supplementary material for: The Calcium Goes Meow: Effects of Ions and Glycosylation on Fel d 1, the Major Cat Allergen
Source: PubMed Central journal article supplement (PMC4489793; doi:10.1371/journal.pone.0132311), 2015-07-02
Supplement: pone.0132311.s010.pdf [file pone.0132311.s010.pdf]

**Table S3. Sizes of simulated systems.**

| System        |                          | Number of atoms | Number of counterions (Na <sup>+</sup> ) |
|---------------|--------------------------|-----------------|------------------------------------------|
| AMBER         | With Ca <sup>2+</sup>    | 28,951          | 8                                        |
|               | Without Ca <sup>2+</sup> | 31,382          | 16                                       |
| CHARMM        | With Ca <sup>2+</sup>    | 31,750          | 8                                        |
|               | Without Ca <sup>2+</sup> | 31,382          | 16                                       |
| GROMOS        | With Ca <sup>2+</sup>    | 34,627          | 8                                        |
|               | Without Ca <sup>2+</sup> | 28,559          | 16                                       |
| Crystal mimic | With Ca <sup>2+</sup>    | 586,592         | 88                                       |
| Glycosylated  | Full glycosylation       | 88,194          | 14                                       |
|               | Minimal glycosylation    | 65,078          | 8                                        |
